# Supplementary material
Source: PubMed Central journal article supplement (PMC6259347)
Supplement: Supplemental_material1.pdf [file Supplemental_material1.pdf]

**Addendum 1.** Description of Semi-Quantitative Histology Scores

| <b>Description of Semi-Quantitative Histology Scores</b> |       |                                                                                                                               |
|----------------------------------------------------------|-------|-------------------------------------------------------------------------------------------------------------------------------|
| Attribute                                                | Score | Description                                                                                                                   |
| Lumen Occlusion Score                                    | 0     | No occlusion                                                                                                                  |
|                                                          | 1     | At least 25% of the lumen area occluded with embolic agent, thrombus, or a combination of the two                             |
|                                                          | 2     | At least 50% of the lumen area occluded with embolic agent, thrombus, or a combination of the two                             |
|                                                          | 3     | >50% of the lumen area occluded with embolic agent, thrombus, or a combination of the two                                     |
| Vessel Wall Inflammation Score                           | 0     | <25% of the vessel wall (1 quadrant) with fewer than 10 inflammatory cells per 40x field                                      |
|                                                          | 1     | Up to 25% of the vessel wall with greater than 10 inflammatory cells per 40x field                                            |
|                                                          | 2     | 25-50% of the vessel wall (up to 2 quadrants) with greater than 10 inflammatory cells per 40x field                           |
|                                                          | 3     | >50% of the vessel wall with greater than 10 inflammatory cells per 40x field                                                 |
|                                                          | 4     | 1 or more granulomatous inflammatory reactions (Include a total count of granulomas across all cross-sections)                |
| Vessel Medial Wall Injury Score                          | 0     | Internal elastic lamina (IEL) intact, endothelium typically denuded, media may be compressed but not lacerated                |
|                                                          | 1     | IEL lacerated, media may be compressed or attenuated but not lacerated                                                        |
|                                                          | 2     | IEL lacerated, media visibly lacerated, external elastic lamina (EEL) intact but may be compressed                            |
|                                                          | 3     | EEL lacerated, typically large lacerations of media extending through EEL                                                     |
| Extravasation of Embolic Material                        | 0     | No extravasation of embolic material outside of the vessel lumen confines                                                     |
|                                                          | 1     | Extravasation of embolic material into perivascular space extending around $\leq$ 1 quadrant of the vessel wall circumference |
|                                                          | 2     | Extravasation of embolic material into perivascular space extending around >1 to 2 quadrant of the vessel wall circumference  |
|                                                          | 3     | Extravasation of embolic material into perivascular space extending around > 2 quadrants of the vessel wall circumference     |
| Vessel Lumen Recanalization                              | 0     | No recanalization                                                                                                             |
|                                                          | 1     | <25% of lumen area open to flow from recanalization                                                                           |
|                                                          | 2     | 25 to 50% of lumen area open to flow from recanalization                                                                      |
|                                                          | 3     | >50% of lumen area open to flow from recanalization                                                                           |
| Perivascular Hemorrhage                                  | 0     | No hemorrhage into the perivascular space                                                                                     |
|                                                          | 1     | Hemorrhage into the perivascular space covering $\leq$ 1 quadrant of the vessel wall circumference                            |
|                                                          | 2     | Hemorrhage into the perivascular space covering >1 to 2 quadrant of the vessel wall circumference                             |
|                                                          | 3     | Hemorrhage into the perivascular space covering > 2 quadrants of the vessel wall circumference                                |
| Arterial Wall                                            | 0     | No necrosis                                                                                                                   |

|                                      |   |                                                                                                                 |
|--------------------------------------|---|-----------------------------------------------------------------------------------------------------------------|
| Necrosis                             | 1 | Necrosis involving 1 to <2 quadrants of the vessel wall                                                         |
|                                      | 2 | Necrosis involving 2 to ≤3 quadrants of the vessel wall                                                         |
|                                      | 3 | Necrosis involving >3 or more quadrants of the vessel wall                                                      |
| Distal Extension of Embolic Material | 0 | No embolic material present in rete cross-sections                                                              |
|                                      | 1 | Extension of embolic material the proximal 1/3 of the rete length                                               |
|                                      | 2 | Extension of embolic material through the proximal 1/3 of the rete length and into the middle third of the rete |
|                                      | 3 | Extension of embolic material into the distal third of the rete length                                          |
| Material in the Brain                | 0 | No evidence of material in the brain                                                                            |
|                                      | 1 | Microscopic or Histological evidence of liquid embolic material in the brain                                    |

## Addendum 2.

**Table 1.** Rete histological scores of animals euthanized at 14 days. Data was determined by collection of fifteen occluded rete cross-sections of each treated animal. Scores adjudicated by the histopathologist based on the collection of cross-sections. An average score and standard deviation were calculated based on the collection of the 15 cross sections. The last column refers to the previous 2-week animal study done with the PHIL 35% parent device for comparison.

|                                      | PHIL LV      |             |             |             | PHIL 35%    |
|--------------------------------------|--------------|-------------|-------------|-------------|-------------|
|                                      | Animal 3     | Animal 4    | Animal 5    | Animal 6    | Average     |
| Luminal Occlusion                    | 3.00 ± 0.00  | 3.00 ± 0.00 | 3.00 ± 0.00 | 3.00 ± 0.00 | 3.00 ± 0.00 |
| Vessel Wall Inflammation             | 0.27 ± 0.59  | 1.47 ± 0.74 | 1.07 ± 0.70 | 1.20 ± 0.86 | 0.51 ± 0.31 |
| Vessel Medial Wall Injury            | 0.93 ± 0.26  | 1.00 ± 0.53 | 0.40 ± 0.51 | 0.13 ± 0.35 | 0.15 ± 0.12 |
| Extravasation of Embolic Material    | 0.00 ± 0.00  | 0.00 ± 0.00 | 0.00 ± 0.00 | 0.00 ± 0.00 | 0.00 ± 0.00 |
| Vessel Lumen Recanalization          | 0.00 ± 0.00  | 0.00 ± 0.00 | 0.00 ± 0.00 | 0.00 ± 0.00 | 0.00 ± 0.00 |
| RBC (Perivascular Hemorrhage)        | 0.00 ± 0.00  | 0.00 ± 0.00 | 0.47 ± 0.74 | 0.20 ± 0.41 | 0.14 ± 0.18 |
| Arterial Wall Necrosis               | 0.067 ± 0.26 | 0.60 ± 0.74 | 0.87 ± 1.06 | 0.33 ± 0.82 | 0.68 ± 0.41 |
| Distal Extension of Embolic Material | 3.00 ± 0.00  | 3.00 ± 0.00 | 2.00 ± 0.00 | 2.00 ± 0.00 | 3.00 ± 0.00 |

**Table 2.** Rete histological scores of animals euthanized at 90 days.

| Histology Identifier                 | PHIL LV       |              | PHIL 35%      |
|--------------------------------------|---------------|--------------|---------------|
|                                      | Animal 7      | Animal 8     | Average       |
| Luminal Occlusion                    | 3.00 ± 0.00   | 3.00 ± 0.00  | 3.00 ± 0.00   |
| Vessel Wall Inflammation             | 1.27 ± 0.88   | 1.27 ± 0.59  | 0.80 ± 1.07   |
| Vessel Medial Wall Injury            | 1.20 ± 0.94   | 1.47 ± 0.64  | 1.63 ± 0.69   |
| Extravasation of Embolic Material    | 0.067 ± 0.26  | 0.067 ± 0.26 | 0.00 ± 0.00   |
| Vessel Lumen Recanalization          | 0.067 ± 0.26* | 0.27 ± 0.46* | 0.00 ± 0.00   |
| RBC (Perivascular Hemorrhage)        | 0.20 ± 0.41   | 0.00 ± 0.00  | 0.008 ± 0.091 |
| Arterial Wall Necrosis               | 0.00 ± 0.00   | 0.00 ± 0.00  | 0.008 ± 0.091 |
| Distal Extension of Embolic Material | 3.00 ± 0.00   | 3.00 ± 0.00  | 3.00 ± 0.00   |

\* Recanalization in these samples was present only within areas of intraluminal organizing thrombus and not within areas of the embolic material.
